# Supplementary material for: Evaluation of the facial profile of skeletal Class III patients undergoing camouflage orthodontic treatment: a retrospective study
Source: PeerJ. 2024 Jul 24;12:e17733. doi: 10.7717/peerj.17733 (PMC11283169; doi:10.7717/peerj.17733)
Supplement: Supplemental Information 1 [file peerj-12-17733-s001.xlsx]

## Sheet: Sheet2
Number	age	sex(1 for male, 2 for female)	skeletal age	ZAngle	LowerLiptoEPlanemm	UpperLiptoEPlanemm	NoseProminence	NasolabialAngle	MentoLabialAngle	ANB	SNA	SNB	MPSN	FMAMPFH	FH-SN	GonialJawAngle	YAxisSGnSN	LFH	PogNBmm	WitsAppraisalmm	U1SN	UIncisorInclinationU1APo	UIncisorProtrusionU1APomm	U1NA	U1NAmm	IMPAL1MP	L1toAPo	L1ProtrusionL1APomm	L1NB	L1NBmm	InterincisalAngle	OccPlanetoSN	Foreheadinclination	FNA	FallGall	FAFallpre	FAGallpre	UIFallpre	UIGallpre	FAFallpost	FAGallpost	UIFallpost	UIGallpost	Zangle2	LowerLiptoEPlanemm2	UpperLiptoEPlanemm2	NoseProminence2	NasolabialAngle2	MentoLabialAngle2
2	15	2	4	64.8	4.9	-0.9	20.1	81.1	139.5	-0.1	80.3	80.4	42.9	33.5	9.4	128.9	72.9	55.2	0	9	115.5	34.9	9.6	35.2	9.7	83.7	27.2	6.9	27	6.8	117.9	22.9	21.4	140	5.5	8.48	2.98	7.89	2.39	6.48	0.98	5.76	0.26	75.4	-0.1	-3.7	22.2	92.6	143.3
17	26	2	6	81.8	-0.8	-3.5	16.9	101.5	141.4	-1.2	80.7	81.8	24.6	14.4	10.2	111.1	67.4	53.9	4.1	4.7	107.8	19.2	3	27.1	5.3	89.7	22.9	1.4	16.1	2.2	138	14.4	25.7	143.1	6.29	4.42	-1.87	4.17	-2.12	4.32	-1.97	4.28	-2.01	85.1	-2	-5.4	17.8	103.4	140.2
22	16	1	5	66.2	4.5	0.5	14.2	74.7	146.7	-0.4	84.1	84.5	33	29.4	3.6	128.7	66.9	53.4	1.3	4	122.3	35.7	9	38.3	9.7	94.1	33.7	7.3	31.6	7.5	110.6	11	25.9	140.4	7.97	8.52	0.55	9.02	1.05	9.4	1.43	10.16	2.19	66.1	4	0.5	14.6	75.8	146.1
30	16	2	4	76.2	0.3	-3.6	16.4	102.5	151.3	-0.4	79.3	79.7	38.9	28.2	10.7	119.3	70.8	52.5	0.8	7.2	110.9	29.5	6.5	31.6	7.1	76.9	17.2	2.4	15.5	2.4	133.3	21.9	26	146.1	10.11	10.75	0.64	9.89	-0.22	10.51	0.4	11.02	0.91	75.8	1.7	-0.8	15.4	100.1	153.6
33	19	2	5	62.6	6.4	0	16.4	98.5	170.5	-0.6	78.7	79.3	43.7	32.1	11.6	125.7	75.2	55.8	-3.6	8.3	107.4	31.6	9.2	28.6	8.2	93.7	33.1	11.4	36.7	9.6	115.3	23.1	26.7	139.9	7.74	8.92	1.18	8.39	0.65	9.36	1.62	8.62	0.88	74.3	2	-1.6	18	96.6	161.2
36	16	1	5	70	3.4	0.7	19	92	135.4	-0.4	83.4	83.8	25.7	20.1	5.6	112.9	66.7	54.2	-0.2	1.6	114.1	30	6.5	30.8	6.7	86.2	16	3.3	15.7	2.9	134	8	12.7	121.6	5.61	1.14	-4.47	1.15	-4.46	2.87	-2.74	3.14	-2.47	75.5	2.1	0.4	17.6	86.1	135.7
44	11	1	3	69.1	3.8	1.6	21.3	96.8	135.7	-1	82.8	83.8	34.5	26.4	8.1	123.6	69.9	53.2	-1.3	8.5	106.8	23.2	5.1	24	5.4	92	30.2	8.7	30.3	7.4	126.7	18.2	25.8	139.5	8.63	10.4	1.77	9.83	1.2	10.77	2.14	10.42	1.79	77.2	1.2	0.9	21.3	83.4	133.1
51	26	1	6	68.5	4.2	-1.3	19.9	93.8	166.5	-0.2	87.3	87.5	32	28.1	3.9	131.7	67.1	57.4	-1.6	4.5	118.4	32.1	8.4	31.1	8.1	90.5	28.9	9.5	30.1	8.9	119	8.3	25.1	139.5	11.4	12.68	1.28	13.73	2.33	11.56	0.16	12.68	1.28	79.1	-0.9	-3.3	17	95.5	167.6
127	25	2	6	76.2	0.8	-3.9	15.7	94.8	166.3	-1.9	84	85.9	33	26.7	6.3	131	67.4	55.9	-1	9	109.9	22.7	4.1	25.8	5	80.1	20.2	4.3	18.9	2.7	137.1	15.6	20.1	145.5	6.69	3.15	-3.54	2.32	-4.37	3.61	-3.08	3.46	-3.23	79.3	-1	-3.6	16.3	83.2	162.5
128	16	2	5	73.8	1.1	-1.6	17.2	93.2	159.6	-1.2	77	78.2	39.9	29.4	10.5	137.9	71	54.5	1.8	5.3	113.3	31.1	6.4	36.4	7.9	84.7	26.9	4.7	22.8	4.7	122	18.6	25.2	147	7.14	4.78	-2.36	4.4	-2.74	6.45	-0.69	7.22	0.08	82.5	-0.3	-2.7	17.1	86.2	136.3
131	21	2	6	70.4	3.2	1.1	19.7	90.4	145.8	-0.2	83.3	83.5	35.2	27.6	7.6	124	69.1	57.2	-1.8	4.5	120.5	39	9.1	37.2	8.6	87.4	24.1	7.4	26.1	6.6	116.9	13.1	24.6	136.1	7.38	6.5	-0.88	6.13	-1.25	5.49	-1.89	4.81	-2.57	76.6	-0.2	-1.3	18.5	92.9	143.3
136	20	2	6	81	-2.9	-4.4	19	88.9	132.5	-0.8	78	78.8	38.8	29.8	9	132.2	73.4	54.7	2.5	5.2	107.4	24.6	4.8	29.4	6.3	77.1	18.7	1	14.7	1.2	136.7	18.7	21	143.7	5.05	-1.38	-6.43	-1.31	-6.36	-1.08	-6.13	-0.66	-5.71	79	-2	-5.3	21.1	91.2	133
173	13	1	4	72.7	2.3	-0.6	21.6	86.7	146.7	-2.1	86.3	88.4	31	31.8	-0.8	134.2	64	56.4	-1.2	9.4	117.2	27.3	6.4	30.9	7.4	84.7	25.5	6.7	24.1	4.8	127.2	12.9	20.9	124.2	8.38	-0.74	-9.12	-0.01	-8.39	-4.7	-13.08	-5.3	-13.68	85.4	-1.2	-1.6	22.8	95	136.2
174	13	2	6	78.8	-0.1	-2.7	16.9	111.7	145.8	-0.7	80.4	81.1	44.3	36.4	7.9	133.6	72.3	55.7	3.3	7.6	111.3	25.8	8.1	30.9	9.9	77.4	27.2	5.8	22.8	6.5	126.9	18.8	23.5	143.8	5.52	2.38	-3.14	1.41	-4.11	3.25	-2.27	2.99	-2.53	76.3	0.2	-2.6	17.4	109.4	144.9
175	11	1	2	76.8	-0.3	-5.1	18.8	95.4	134.3	-1.3	74.1	75.4	31.4	23.9	7.5	126	72.5	53.3	1	3.5	109.3	30.3	6.1	35.2	7.3	90	20.3	2.2	16.8	1.6	129.4	18.6	16.8	145.9	3.09	-2.5	-5.59	-2.2	-5.29	-2.04	-5.13	-1.55	-4.64	78.1	-0.3	-2.1	17.9	90.9	130.8
178	20	2	5	83.8	0.2	-3.3	20.4	86.7	129.3	-3.9	81.8	85.7	29.4	21.3	8.1	127.2	64.3	52.1	1.2	8.5	116.1	23.1	3.2	34.3	6.1	84.8	27.1	6.5	19.8	3.8	129.8	12.8	23.5	135.4	8.33	-1.5	-9.83	0.08	-8.25	1.49	-6.84	2.47	-5.86	84.3	-1.4	-1.6	20	87.4	106.9
181	23	2	6	63.5	5.1	-1.1	15.9	100.9	143.9	-0.2	77.9	78.1	38.5	29.4	9.1	122	75.1	55.7	-0.3	3.1	116.9	38.8	11	39	11	95.5	32.1	8.2	32.1	8	109.1	16.8	19.4	150.1	4.54	9.73	5.19	10.18	5.64	4.94	0.4	5	0.46	73.4	0.1	-3.5	16.5	100.4	139.9
182	16	2	5	61.2	4	-3.6	19.8	94.4	149.1	-1.8	76.8	78.6	32.6	23.9	8.7	106	71.7	51.4	-0.5	8.9	107.8	27	6.1	31	7.3	94.2	27.6	9.3	25.3	7.7	125.4	24.2	27.3	141.8	9.65	3.75	-5.9	3.74	-5.91	5.67	-3.98	6.25	-3.4	69.4	1.8	-2	18.6	97.1	145.7
183	19	2	5	69.1	5.2	-0.9	19.5	75.2	135	-0.6	84.1	84.7	32.4	23.5	8.9	110.5	68	52.9	-1.9	3.8	126.5	43.4	13.3	42.4	13	96.9	32.4	9.3	34	8.2	104.1	10.7	23.2	138.3	5.25	5.64	0.39	6.81	1.56	3.5	-1.75	3.27	-1.98	81	0.4	-0.9	17	94.9	136
185	23	1	6	78.3	-0.8	-3.7	14.4	101.7	144.8	-0.1	78.8	78.9	35.6	24.6	11	127.2	72.2	54.8	3.1	4.2	102.3	19.8	8.2	23.4	9.4	84.8	22.9	4.3	19.4	5	137.3	17.6	22.8	141.8	7.33	4.13	-3.2	3.27	-4.06	4.47	-2.86	3.48	-3.85	74.6	-0.7	-6	15.8	101.2	146.4
194	23	2	6	81.4	-0.4	-2.9	18.5	100.1	144.1	-0.2	83.9	84.2	31.2	22.2	9	132.1	63.7	56	1	4.8	117.6	31.7	6.6	33.7	7.1	79.2	16.3	3.1	14.6	3.3	132	14.1	26.2	139.3	7.41	6.96	-0.45	6.15	-1.26	3.72	-3.69	4.42	-2.99	82.6	-1.1	-3.2	16.5	98.3	136.3
195	29	1	6	86.8	-4.9	-5.7	21.9	91.9	153	-1.1	74	75	33.8	18.9	14.9	126.7	69.8	53.8	4.7	2.7	97.4	15.6	3.3	23.4	5.7	84.3	19.9	0.3	13.1	1	144.5	17.1	25.1	135.7	10.23	6.43	-3.8	6.13	-4.1	6.34	-3.89	6.73	-3.5	89.7	-4.2	-5.7	22.9	89	144
201	11	1	3	71.9	2	-1.9	23.7	84.5	124.7	-1.9	76.7	78.6	33	23.3	9.7	127.2	69.2	50.4	2	7.9	100.5	15.9	1.5	23.8	3.7	86.1	23.7	4.7	17.8	3.8	140.4	21.9	27	145.8	8.84	1.72	-7.12	1.27	-7.57	3.63	-5.21	4.07	-4.77	75.2	0.5	-1.6	20.1	92.3	114.5
213	33	1	6	66	5	-2.5	19.1	106.8	133	-0.4	81.8	82.3	34.1	24.6	9.5	127	69.9	54.2	-0.9	9.4	100.8	19	4.3	19	4.3	91.7	27.7	8.6	28.1	8	133.3	22.1	28.2	136.7	10.24	9.77	-0.47	8.81	-1.43	12.58	2.34	13.15	2.91	68.1	4	-0.2	17.1	99.4	140.2
214	13	2	4	88.1	-0.7	-3	18.3	90.4	127.9	-1	82.8	83.8	33.3	20.4	12.9	125.2	67.5	53.4	0.1	4.9	111.7	26.3	3.4	29	4	77	15.8	1.5	14.1	0.7	137.9	14	22.1	139.3	6.8	5.67	-1.13	5.64	-1.16	9.62	2.82	9.52	2.72	90.1	-0.9	-3	18.4	85.7	114.7
221	18	2	6	74.3	-0.1	-3.1	17.5	108.5	157.4	-0.1	79.5	79.6	42	36.3	5.7	132.8	70.2	56.8	-0.2	3.9	113.8	34.2	7.5	34.4	7.5	80.5	22.1	4.6	22.1	4.4	123.7	16.5	27.3	145.5	7.65	3.46	-4.19	3.78	-3.87	4.89	-2.76	4.46	-3.19	78.3	-0.6	-2.6	19.1	114.1	154.3
274	12	2	4	72.5	2.5	-0.2	21.4	103	153.7	-0.9	81.6	82.5	35.2	27.4	7.8	134.6	65.8	57.1	-0.7	6.6	111	28.3	5.8	29.4	6.1	87.1	25	6.4	24.8	5.5	126.7	17.5	19.9	137	4.54	4.54	0	4.24	-0.3	3.27	-1.27	2.48	-2.06	85.3	-1.7	-4.4	20.8	97	146.3
275	13	1	5	67.4	6.4	2.3	15.5	87.9	140	-0.5	83.9	84.3	32.6	22.4	10.2	120.8	69.4	55.5	-1.3	4.7	105.6	22	6.7	21.7	6.5	93.9	30	10.7	30.8	10	127.9	11.7	21	136.4	8.37	6.82	-1.55	6.31	-2.06	6.68	-1.69	8.07	-0.3	76.4	2.8	0.9	18.4	90.3	161.9
276	24	2	6	82.9	-1.6	-1	20.7	88.4	134.9	-0.3	81.6	81.9	37.4	30.6	6.8	129.7	71.2	54.5	2.5	5.1	110.8	25.7	6.2	29.2	7.3	80.8	23.4	3.8	20.2	4.5	130.9	15.6	15.4	128.6	5.71	4.57	-1.14	4.33	-1.38	2.12	-3.59	2.2	-3.51	88.6	-2.9	-2.5	19.7	72.6	133.7
325	11	2	3	72.5	0.9	-1.3	16.7	98.4	136.3	-1.3	77.9	79.3	36.2	30.6	5.6	131.1	67.5	52.5	1.3	7.6	106.5	23.7	4.7	28.6	6.2	71.1	10.1	0.8	6.5	0.4	146.2	21.5	22.5	148.6	5.7	2.15	-3.55	1.76	-3.94	2.03	-3.67	1.58	-4.12	79.5	-1.6	-3.1	20.8	84.8	135.6
329	22	1	6	78.9	-0.5	-6	17.6	97.1	162.4	-2.9	79.3	82.2	35.6	26	9.6	124.3	70.2	55.8	1.3	8.4	108.2	21.2	6.3	28.8	9.2	76.7	19.3	5.8	14.5	4	139.5	13.7	27.5	133.3	10.66	6.48	-4.18	6.04	-4.62	6.78	-3.88	7.07	-3.59	70.4	1.6	-4.2	19.2	90.7	135.4
343	19	2	5	84.9	-1.9	-3.5	20.7	84.6	156.2	-2.7	81.1	83.9	34.9	26.8	8.1	124.1	67.2	54.9	1.8	10.9	107.8	18.6	4.5	26.7	7.5	69.4	13.5	2	8.2	0.8	147.9	17.8	27.3	138.4	4.93	2.24	-2.69	1.42	-3.51	3.1	-1.83	2.87	-2.06	84.8	-1.4	-3.7	19.3	69.4	147.7
495	28	1	6	69.1	5.3	-0.9	16.2	88	122.8	-3.7	81.3	85	26.1	18.2	7.9	115.8	64.8	52.5	1.4	6.1	129	37.1	10	47.6	12.8	89.9	27.8	7.3	21	4.7	115.1	8	25.1	138.3	11.8	13.26	1.46	14.82	3.02	9.34	-2.46	10.56	-1.24	83.2	0.2	-2.9	17.7	97	117.6
498	20	1	6	63.6	4.6	0.8	17.8	88.4	125.9	-0.2	81.3	81.5	33.4	28.5	4.9	124.7	69.5	55.5	0.1	4.6	106.7	24.7	6.1	25.4	6.3	82.6	18	4.4	17.6	4.3	137.3	14.8	18.4	140.6	6.25	-0.1	-6.35	-0.03	-6.28	0.7	-5.55	-0.72	-6.97	64.6	3	-1	19.2	95.9	137.8
511	15	2	5	77	-0.3	-2.2	16.3	106.3	134	-1	78.3	79.4	34.6	27.6	7	119	70.7	52.3	3.6	4.9	115.1	30	8.8	36.8	11	88.6	28.4	4.8	22.5	5.4	121.7	16.9	11.8	141.4	3.43	-1.16	-4.59	-1.21	-4.64	-2.63	-6.06	-3.35	-6.78	77.8	1.5	-1.9	17.5	100.1	129.6
554	14	2	4	84.1	-0.7	-1.8	18.2	109.6	129	-0.4	81.1	81.5	36.3	25.2	11.1	124	70	56.2	-0.3	5.5	105.6	23.9	6.7	24.5	6.9	77.4	15.4	2.3	15.2	1.9	140.7	17	12.7	138	3.59	-1.13	-4.72	-1.79	-5.38	-3.55	-7.14	-4.41	-8	85.4	-1	-2.6	16	105.3	135.8
555	10	1	3	86.7	-0.7	-5.5	16.2	114.3	147.7	-3.5	80.1	83.7	37.2	29.9	7.3	130.8	68	56.4	1.3	10.1	100	10	-0.6	19.8	2.1	69.5	16.7	5	10.4	2.5	153.3	17.8	17	141.7	3.95	-1.77	-5.72	-2.32	-6.27	-1.26	-5.21	-1.18	-5.13	81.7	-0.4	-4.2	17.1	108.8	140
556	25	2	6	78.7	0	-3.4	17.3	97.8	150.3	-1	79.6	80.6	32.3	22.7	9.6	122	68.7	52.1	0.3	7.8	97.5	15.2	1.7	17.9	2.5	81.1	15.7	3.1	14	2.5	149.1	20.7	12.9	138.9	3.64	4.9	1.26	3.85	0.21	4.24	0.6	4.07	0.43	75.2	0.5	-2.2	15.5	93.2	141.4
557	28	2	6	81.3	1	-4.4	16.2	80.8	147.9	-5	79	83.9	28.3	16.3	12	113	66.1	53.5	1.1	12.7	105.3	13.6	1	26.4	5.4	82.1	22.1	5.2	14.3	2.4	144.3	19.8	19.7	139.3	4.75	-1.93	-6.68	-2.92	-7.67	0.81	-3.94	1.08	-3.67	78.4	1.3	-3.6	16.5	84.3	146.6
558	18	2	5	79.2	0.8	-2.5	18.6	85.2	147.6	-3.3	86.3	89.7	38.2	35.7	2.5	138.6	64.3	52.7	-0.5	13.4	114.5	20.8	3.8	28.1	6.3	75.9	27.8	9.9	23.8	7.1	131.4	17.3	17	141.5	3.29	2.41	-0.88	2.28	-1.01	12.75	9.46	14.34	11.05	82.1	-1.8	-2.6	16.9	92.4	156.4
559	18	2	5	72.5	3.2	-2.4	23.2	93.7	150.5	-1.1	85.8	86.8	33.4	27.6	5.8	128	65.7	55.5	-0.5	9	102.2	14.8	1.7	16.5	2.3	76.8	17.6	5.5	17	4.7	147.6	15.9	15.8	127.1	3.91	1.21	-2.7	0.02	-3.89	5.75	1.84	5.8	1.89	77.8	0.6	-1.6	21.5	103.9	147.5
561	13	1	4	69.3	3.2	-3.8	17.2	91.6	149.9	-0.9	82.9	83.8	40.6	34.3	6.3	135.5	70.2	53.7	-0.1	10.5	112.7	27.9	7.2	29.8	7.9	80.7	26.2	8	25.1	7.2	126	19.3	23.3	135.3	7.78	10.93	3.15	11.35	3.57	12.25	4.47	13.02	5.24	74.8	1.7	-1.4	18	84.5	132.7
562	13	2	5	77.9	1.2	-5.1	18	96.6	141.9	-4.9	79.5	84.4	41.2	33.4	7.8	142.6	67.6	55.3	0.5	14	112	20.6	4	32.5	7.6	70.7	23.3	5.7	16.4	2.5	136.1	19.2	18.2	144.6	4.07	1.09	-2.98	0.64	-3.43	0.83	-3.24	0.9	-3.17	79.8	0.2	-5.4	16.7	96.3	111.9
563	18	2	5	75.3	3	-1.9	19.5	94.3	142.2	-1.2	82.5	83.7	39.7	32.4	7.3	136.6	70.4	52.9	-1.6	7.7	112	28.7	5.7	29.5	6	85.1	28.1	8.9	28.5	7.5	123.2	17.3	28.8	137.9	7.4	3.79	-3.61	3.43	-3.97	9.12	1.72	9.75	2.35	75	2.2	-1.1	17.3	96.5	140.9
564	25	1	6	84.7	-0.1	-5.4	16.8	95.1	140.8	-3.6	85.8	89.4	26.5	21.5	5	115.9	64.1	53.3	-0.9	9.1	108.6	15.4	2.7	22.7	5	81.7	21.3	8.3	17.6	5.1	143.3	8.9	24.3	136.5	7.87	5.33	-2.54	4.34	-3.53	9.96	2.09	10.44	2.57	84.6	-2.8	-4.7	16.9	99.9	154.8
565	18	2	5	79.3	-0.1	-3.3	16.3	92.9	166.8	-3.4	76.7	80.1	43.5	33.8	9.7	129.2	71.6	53.8	0.9	14.7	108.8	23.1	4.7	32	7.3	73.3	22.4	5.1	16.9	3.2	134.4	27.3	23.1	139	6.64	6.6	-0.04	5.81	-0.83	6.01	-0.63	4.61	-2.03	80	-1.3	-3.7	15.9	101.9	154.4
566	20	2	6	85.4	-3.5	-6.3	18.5	105.8	157	-1.9	79.5	81.4	41.1	31.2	9.9	128.2	70.1	53.3	-0.2	9.6	109.4	25.7	3.4	29.9	4.4	72.2	17	4	14.7	2.6	137.3	21	27.9	137.7	9.6	9.99	0.39	9.22	-0.38	8.8	-0.8	8.26	-1.34	89	-4.2	-6.1	17.2	113.9	148.6
567	22	1	6	82.8	-2.6	-5.9	18.9	88.1	146.5	-3.8	79	82.7	36.7	30.9	5.8	129.7	69.9	54.8	2.3	9.1	113	22.8	4.4	34	8.2	77.9	24.8	5.5	17.4	3.5	132.4	13.9	37.6	140.6	9.86	2.49	-7.37	1.36	-8.5	3.78	-6.08	4.48	-5.38	87.4	-3.1	-5.2	20.4	84.5	143.6
568	26	2	6	75.8	2	-4.8	20.5	96.7	164.4	-2	82.3	84.3	41.3	31.9	9.4	131.7	70.6	54	-2.7	12.3	113.1	29.4	5.6	30.8	6	75.8	20.9	8.4	21.4	6	129.8	22.1	21.4	139.2	6.46	6.58	0.12	6.35	-0.11	6.63	0.17	6.29	-0.17	80.9	-0.3	-3.2	19.6	96.8	150.7
569	13	1	4	66.7	2.4	-4.7	18.2	106	141.1	-3.8	81.5	85.3	36.6	36.7	-0.1	136.4	67.1	50.2	-1.2	13.3	108.9	19.4	2.8	27.4	5.2	74.6	20.7	6.6	16.5	3.1	139.9	20.9	24.8	129.3	5.66	2.26	-3.4	1.55	-4.11	4.27	-1.39	4.39	-1.27	73	1.2	-1	18.6	95.1	113.1
571	24	2	6	72.1	2.8	-2.1	17.5	103.2	152.3	-0.2	79	79.2	41.8	28.6	13.2	130.4	73	54.7	-0.8	8.6	97.1	18.6	4.6	18	4.4	88.3	28.6	8.5	29.3	8.1	132.8	23	26.1	134.2	8.12	8.81	0.69	8.99	0.87	8.76	0.64	9.17	1.05	82.8	-1.2	-2.4	18.4	102.1	157.3
573	25	2	6	75.5	1.7	-0.8	17.3	91	153.9	-2	78.7	80.8	36.7	27.5	9.2	122.9	70.5	55	0.5	7.6	115.3	31.4	7.1	36.6	8.6	88.4	29	7.1	25.8	6	119.6	17.6	27	142.4	8.78	7.51	-1.27	7.74	-1.04	9.18	0.4	9.08	0.3	76.9	0.4	-0.5	20.6	81.8	143.5
574	25	1	6	70.8	3.7	-1.5	14.9	91.4	164.8	-0.7	80.9	81.6	41.1	32.5	8.6	129.9	71.3	56	-0.2	9.4	108.2	26	7.4	27.3	7.9	80.2	23.6	6	22.9	5.3	130.5	19.3	28.8	148.6	10.19	14.54	4.35	14.14	3.95	16.48	6.29	16.74	6.55	71.5	2.3	-1.3	14.5	82.2	163.5
575	20	2	5	80.8	0.2	-2.3	20.7	81.8	140.5	-0.5	81.6	82.1	24.9	17.6	7.3	109.7	67	55.2	1.8	4.4	106.5	21.6	4.7	24.9	5.7	95.8	25.6	5.7	22.8	5.9	132.8	13.8	25.4	134	10.15	4.58	-5.57	3.47	-6.68	3.28	-6.87	2.4	-7.75	89.4	-5.8	-3.6	22.7	84.1	132.8
576	11	2	2	67.7	3.6	-3.3	19.1	90	132.8	-3.7	76.4	80.1	36.7	26.9		127.1	68.7	52.7	-0.1	9	101.9	16.5	1.3	25.4	3.8	79.7	21.8	5.2	16.5	2.4	141.7	20.3	24	135.8	7.55	-4.02	-11.57	-5.09	-12.64	0.05	-7.5	3.02	-4.53	83.6	-1.7	-4.8	18.3	95.1	129.4
588	13	1	4	66	4.4	-0.6	18.5	94.7	136.9	-5.9	72.9	78.8	40.5	33.6	6.9	137.7	69.3	54.4	1.7	12.1	105.1	16.9	3.2	32.2	8.7	68.8	17.5	6.5	8.1	2.5	145.6	19.6	21.4	139	5.37	-4.3	-9.67	-4.62	-9.99	-0.04	-5.41	1.55	-3.82	71.5	2.6	-0.4	16.6	95.6	150.7
589	12	2	4	76.1	0.3	-0.5	16.6	105.2	138.6	-2.9	81.9	84.7	32.1	28.6	3.5	129.2	66	51.3	-0.5	10.5	112.2	24.1	3.4	30.4	5.2	82	22.2	5.4	18.8	3.2	133.7	19.4	17.7	138.6	5.6	1.32	-4.28	0.02	-5.58	2.8	-2.8	1.92	-3.68	80.6	-2.5	-3	18	112.9	156.9
590	10	2	3	61.3	5.4	2.7	18.2	98.6	147	-0.2	79	79.3	37.5	28.5	9	124.7	70.8	53.8	-1.9	4.6	117.3	40.5	8.3	38.2	7.8	95	29.3	8.2	31.7	7.3	110.3	18.6	13.3	138.6	4.24	1.59	-2.65	2.1	-2.14	1	-3.24	0.69	-3.55	73.2	3.8	3.2	17.4	99.5	148.9
591	18	2	6	91	0.4	-1	19.2	65.8	134.2	-5.3	86.6	91.8	22.3	18.3	4	121.2	59	53.3	2.8	7	122.6	20	1.4	36	5.5	73.1	18	3.4	7.2	0.7	142	1.6	16.6	136.3	4.5	-6.37	-10.87	-6.26	-10.76	-4.13	-8.63	-3.83	-8.33	88.7	-0.5	-0.9	20.8	70.6	132.4
592	12	2	5	75.5	0.7	-2.3	17.6	112	140.8	-0.2	81.1	81.3	43	36.5	6.5	141.4	71.2	54.5	0.1	9.5	102.3	20.6	4.6	21.3	4.8	78.6	23.3	4.3	22.9	4.2	136	23.1	25.7	140.2	5.89	3.49	-2.4	2.77	-3.12	5.45	-0.44	4.81	-1.08	73	2.5	-0.4	19.6	96.1	131.2
593	12	1	3	75.3	1.8	-1.9	16	96.3	154.6	-5	78.6	83.5	36.1	27.7	8.4	134.5	66.2	48.1	-0.1	10.5	112.7	21.4	3.3	34.1	6.8	77.9	25.3	7.1	17.6	3.5	133.3	16.7	16.6	137.6	5.15	1.44	-3.71	0.97	-4.18	3.93	-1.22	4.39	-0.76	68	4.2	1.4	16	100.3	138.2
596	12	2	3	80	-0.3	-4.3	17.8	98.9	146.8	-5.8	79.3	85.1	31.2	28.2	3	123.4	65.1	55.3	-1	10.5	113.9	23.1	6.2	34.7	9.9	84.8	26.8	8.4	21.2	4.4	130	12.4	14.8	141	3.96	-6.12	-10.08	-6.67	-10.63	-3.15	-7.11	-2.28	-6.24	78.2	0.6	-1.7	16.6	96.3	139.7
598	23	2	5	86.5	-0.9	-4.8	17.8	93.7	151.9	-1.3	83.9	85.3	40.1	30.8	9.3	137.5	66.8	57.5	-0.4	9.7	110.9	24.5	6.4	26.9	7.2	69.3	15.8	4.2	14.6	3.2	139.8	17.2	20.7	141	4.78	2.42	-2.36	1.19	-3.59	0	-4.78	-1.59	-6.37	81.6	-0.2	-3.6	20.7	101.7	132.7
599	18	2	5	80.4	2.1	-1.9	18.2	85.6	140.8	-0.3	85.9	86.3	38.2	29.9	8.3	133.4	66.3	54.3	-1.7	8	121.2	36.5	8.2	35.3	7.8	90.9	33.8	9.3	35.4	8.4	109.7	16.2	29.1	146	9.11	12.65	3.54	13.09	3.98	14.95	5.84	15.15	6.04	75.8	2.4	-0.1	18.7	88.2	125.1
600	19	2	5	85	-0.8	-3.6	20.2	88.2	141.6	-2.3	86.4	88.7	34.4	27.4	7	138	64.8	55.6	-0.4	9.5	123	31.8	6	36.6	7.4	79.3	24.9	6.9	22.4	5.1	123.4	13.3	21.8	136.5	5.6	7.34	1.74	7.21	1.61	9	3.4	10.18	4.58	86.7	-1.2	-3.3	20.6	83.6	141.6
601	25	2	6	75.4	1.2	-4.7	20.8	79.9	152.3	-2.9	83.1	86	33.7	30.2	3.5	126.3	66	53.9	-0.1	8.1	112	22.2	5.1	28.8	7.4	84.6	28.1	9.2	24.3	7	129.7	11.9	32	142.4	9.87	4.24	-5.63	3.58	-6.29	11.48	1.61	12.59	2.72	76.6	-0.1	-1.9	20	80.7	147
603	25	2	6	84.3	-1.4	-8.8	23.1	95.2	129.8	-2	79.6	81.6	36.5	25.1	11.4	129.2	67.8	51.6	-0.8	8	105.1	21.6	3.5	25.5	4.6	80.8	20.8	5.8	18.9	4	137.6	18.2	22.7	146.1	7.81	2.96	-4.85	2.41	-5.4	7.51	-0.3	7.36	-0.45	85.9	-2.6	-5	19.1	101.2	116.4
604	28	2	6	90.4	-2.8	-7	19.1	91.8	145.8	-3.8	86	89.7	27.1	24.8	2.3	134.5	61.2	53.7	2.2	9	116.4	19	3	30.5	6.4	76	20.5	5.3	12.8	3.3	140.5	8.3	25.8	140.8	6.57	5.9	-0.67	5.6	-0.97	7.57	1	7.89	1.32	92.4	-3.4	-5.1	19	88.5	130
605	24	2	6	65.9	3	-2.5	20	83.3	149.7	-0.2	78.6	78.8	50.7	42.7	8	149.6	73	57.2	1.6	7.4	98.5	17.8	4.7	19.9	5.4	69.9	21.3	5.2	19.4	5.7	140.9	21.7	26.1	136.1	11.2	5.28	-5.92	3.28	-7.92	7.88	-3.32	7.41	-3.79	64	3	-2	19.3	78	136
606	21	1	6	73.3	5.3	1.6	18.4	91.6	140.9	-1.2	84.3	85.5	33.8	23.7	10.1	132	68.4	55.6	-0.9	7.5	114	28	7.4	29.8	8	90.1	29.9	8.3	29.4	7	122.1	13.5	27.8	129.5	11.18	12.1	0.92	10.56	-0.62	13.41	2.23	14.03	2.85	77.9	5	3.7	18.6	87.7	132.3
608	9	2	3	72.6	1	-3.3	18.7	80	155.4	-2.3	79.7	82	36.2	34.7	1.5	131.6	67.4	55.1	1.7	-6.9	116.4	28.9	4.9	36.6	7	83.6	27.3	6.4	21.8	5.5	123.8	15.5	25.5	135.5	6.90789	4.74163	-2.16627	5.05742	-1.85048	3.911	-2.77137	3.49188	-3.19049	81.5	-3.6	-3	18.2	85.1	166.6
609	26	1	6	95.2	-5.5	-6	20.6	84.2	133.7	-5	90.1	95.2	23.5	23.9	-0.4	129.1	56.5	56	5.1	-10.1	128.5	22.4	1.7	38.3	6.1	69.1	18.6	1	7.8	-0.7	138.9	2.4	25.8	120.6	11.6378	1.87578	-9.76203	2.18006	-9.45775	2.07437	-9.73137	2.45279	-9.35295	91.7	-5.2	-5.5	18.8	87.2	141
610	18	2	5	77.4	-1.3	-5	21.3	108.1	149.2	-0.4	80	80.4	39.8	30.5	9.3	124.7	71.7	55.1	-0.5	-8.6	106.8	26.6	6.3	26.9	6.4	85.7	25.8	3.9	25.9	3.5	127.6	24.2	23.9	141.2	6.36938	11.5232	5.15381	11.7619	5.39256	13.0975	6.96457	13.3694	7.23652	76.1	0	-5.8	23.3	122.4	150.6
611	11	2	3	63.6	3.6	-2.6	20.7	101.1	140.5	-3.6	73.9	77.4	39.8	28.8	11	130.3	72	55.5	-1.3	-6.8	100	19.8	4.2	26.2	6.4	83.5	23.6	7.7	20.7	4.9	136.7	17.2	24.5	135.1	4.22593	1.30432	-2.92162	-0.559592	-4.78552	7.47382	3.0548	7.90131	3.48228	66.4	3.7	-1.9	20.7	86.1	135.6
612	13	2	4	78.2	-1.9	-5	21.3	97.3	143.6	-1.9	77.3	79.2	45.9	36.4	9.5	146	73.4	51.1	-2.1	-12.2	93.1	14	3.3	15.8	4	72.7	17.7	5.7	17.8	3.6	148.2	29.1	27.4	143.2	8.28623	11.1278	2.84159	9.81722	1.53098	13.8105	5.4737	14.7645	6.42764	79.4	-2.7	-2.3	22.3	87.3	135
613	12	1	2	81.3	2.9	-1.1	16.1	90.3	133.1	-3.5	83.5	87	26.3	18.3	8	113.4	63.4	54.8	-0.2	-8.7	117.8	26.1	4.1	34.4	6.3	82.8	20.9	5.9	16.1	3.3	133.1	12.3	20.3	145.2	5.06039	3.14038	-1.92001	3.21673	-1.84366	5.0926	-0.00955909	5.80476	0.702593	75.2	5.1	2.9	21.1	88.6	128.8
614	12	2	3	74.5	1.5	-3.6	15.8	89.8	144.6	-4.2	78.7	83	35.4	29.6	5.8	126	68.8	54	0.9	-11.5	109.8	20.6	3.4	31.1	6.7	80	24.6	5	18.3	2.9	134.8	18.9	24.7	144.4	6.40821	6.83967	0.431463	6.94053	0.532325	8.80282	1.71155	9.38017	2.2889	75.5	1.8	-2.6	17	80.6	132.9
615	15	2	5	68.9	3.6	-3.6	15.4	97.7	145.4	-0.9	84	84.9	41.1	35.3	5.8	141.8	70.2	55.4	-1.4	-9.7	112.5	28	6.2	28.5	6.4	81.3	27	7.6	27.4	6.4	125	19.2	26.3	143.7	7.30444	12.4966	5.19213	12.1043	4.79991	14.2984	6.73274	14.4447	6.87899	74.8	2.1	-4	15.3	90.1	142.2
616	11	2	3	69.8	1.6	-1.1	17.2	96.5	135	-2.1	79.2	81.4	35.4	31	4.4	133.1	67.9	53.6	-0.7	-6.8	112.4	29	4.5	33.2	5.4	82.9	21.8	4.5	19.7	2.8	129.3	17.7	29.4	138.9	9.12809	14.1606	5.03254	14.892	5.76394	15.7931	6.53685	15.9075	6.65122	63.8	3.8	0.7	17.4	100.7	151.5
617	34	2	6	69.2	2.4	-3.6	19.7	87.1	158.4	-1	83.3	84.2	34	29.1	4.9	132.5	68.5	54.8	-1.9	-4.5	109.6	26.5	4.8	26.4	4.8	86.3	23.4	7.7	24.5	6.4	130.1	15.5	23.4	137.4	5.75253	6.66715	0.914616	6.20767	0.455137	9.09972	3.24604	9.53691	3.68324	70.1	1.6	-1	21	88.6	145.5
618	35	2	6	87	-4.2	-5.4	20	93.4	157.7	-0.3	85.7	86	34.9	30.5	4.4	131.1	67	54.1	1.6	-1.5	97.6	9.1	-0.1	11.9	0.5	71.7	15.1	0.4	12.6	0.7	155.8	6.4	29.8	147.6	9.4182	6.5642	-2.854	5.5242	-3.89399	6.90669	-2.95847	6.71521	-3.14995	85.4	-5.2	-4.4	20.7	92	149
[truncated: 58 more columns]
